# Supplementary material for: A comprehensive epigenome map of Plasmodium falciparum reveals unique mechanisms of transcriptional regulation and identifies H3K36me2 as a global mark of gene suppression
Source: PubMed Central journal article supplement (PMC4574195; doi:10.1186/s13072-015-0029-1), 2015-09-17
Supplement: 13072_2015_29_MOESM1_ESM.pdf [file 13072_2015_29_MOESM1_ESM.pdf]

**A comprehensive epigenome map of *Plasmodium falciparum* reveals unique mechanisms of transcriptional regulation and identifies H3K36me2 as a global mark of gene suppression**

**Krishanpal Karmodiya<sup>1\*</sup>, Saurabh J. Pradhan<sup>1¶</sup>, Bhagyashree Joshi<sup>1¶</sup>, Rahul Jangid<sup>1</sup>, Puli Chandramouli Reddy<sup>1</sup> and Sanjeev Galande<sup>1,2</sup>**

<sup>1</sup>Department of Biology, Indian Institute of Science Education and Research, Pune, Maharashtra, India.

<sup>2</sup>National Centre for Cell Science, Pune, India

\*Corresponding author

E-mail: [krish@iiserpune.ac.in](mailto:krish@iiserpune.ac.in)

¶These authors contributed equally to this work

**Krishanpal Karmodiya: [krish@iiserpune.ac.in](mailto:krish@iiserpune.ac.in)**

**Saurabh J. Pradhan: [saurabh.j.pradhan@gmail.com](mailto:saurabh.j.pradhan@gmail.com)**

**Bhagyashree Joshi: [bsjoshi.305@gmail.com](mailto:bsjoshi.305@gmail.com)**

**Rahul Jangid: [rahulkumarjangid@gmail.com](mailto:rahulkumarjangid@gmail.com)**

**Puli Chandramouli Reddy: [pulichandramoulireddy@gmail.com](mailto:pulichandramoulireddy@gmail.com)**

**Sanjeev Galande: [sanjeev@iiserpune.ac.in](mailto:sanjeev@iiserpune.ac.in)**

**Additional Figure S1. Validation of (A) H3K4me3 and H3K9ac ChIP-seq in *Plasmodium falciparum* trophozoite chromatin by ChIP-qPCR.** Peaks of local enrichment of H3K4me3 and H3K9ac were determined by ChIP-qPCR. Input DNA was used to make the standard curve to determine the relative concentration of control and the promoter genomic regions (shown on the right of the graph). Fold enrichment is plotted over an arbitrarily chosen control genomic region (labeled as control). **(B)** Sequential ChIP-qPCR quantification for co-occupancy of H3K9ac (primary ChIP) and H3K4me3 (secondary ChIP) at randomly selected H3K9ac and H3K4me3 loci suggest that these loci are co-marked with H3K9ac as well H3K4me3 modifications. Enrichment after first ChIP using H3K9ac followed by re-ChIP with no antibody was used as a control. Error bars represent the standard deviation for three technical replicates. List of primers is provided in Additional Table S5.

**A)**

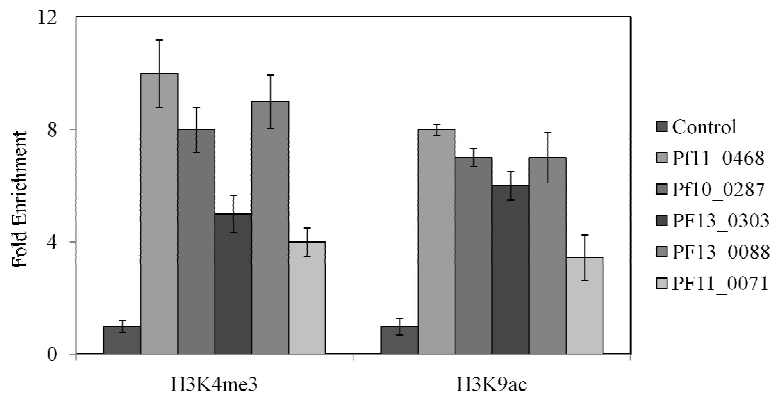

**B)**

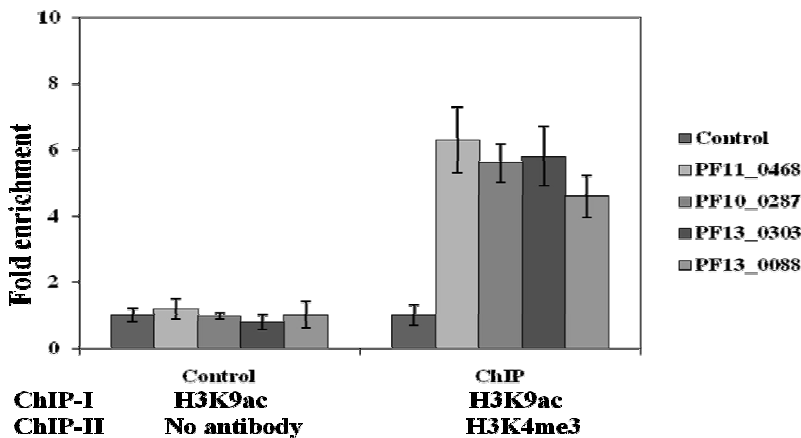

**Additional Figure S2. Average transcribed genome coverage in ChIP-seq at different stages of *Plasmodium falciparum* growth.** Transcribed genome coverage was calculated for all three stages and each histone modification. The average transcribed genome coverage obtained is ~50x.

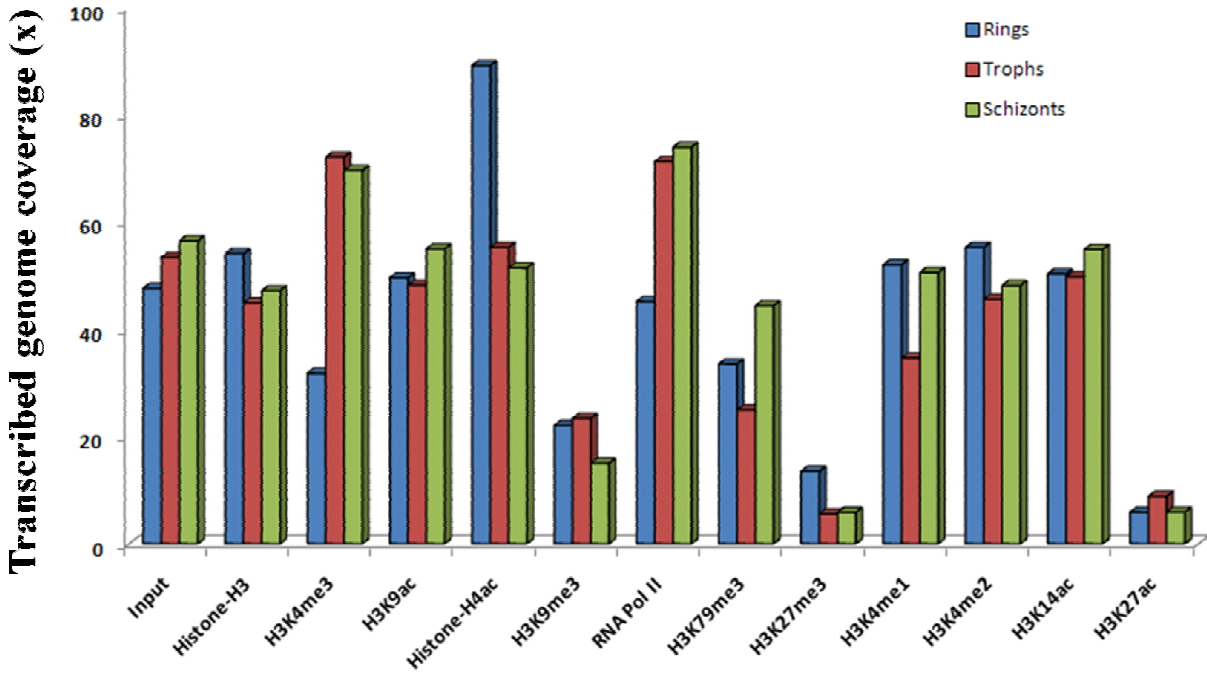

**Additional Figure S3. Comparison of H3K4me3 and H3K9ac data produced in this study with existing ChIP-sequencing data for these two histone modifications.** Dot plot representing enrichment of H3K4me3 and H3K9me3 data generated in this study and other study over 5,265 *Plasmodium* genes. Our data shows Pearson correlation coefficient 0.91 and 0.88 for H3K4me3 and H3K9me3 respectively with publicly available data sets (Salcedo-Amaya et al. 2009).

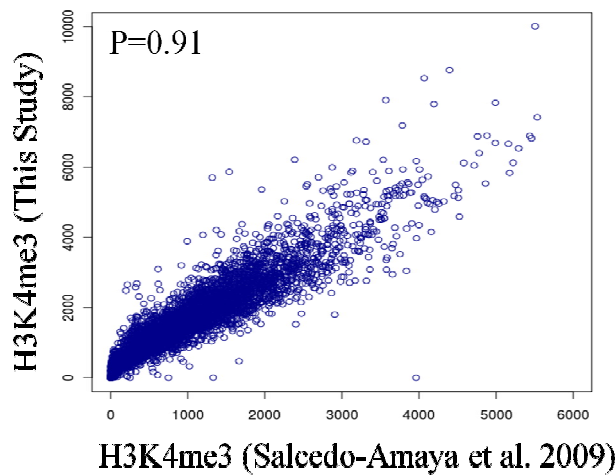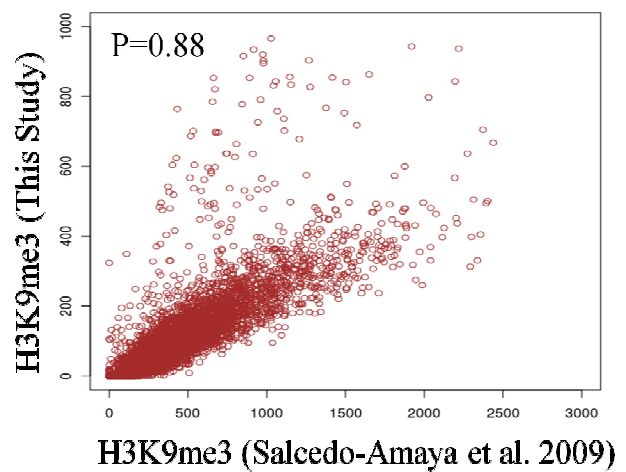

**Additional Figure S4. Comparison of H3K4me3 modification profile of the data produced in this study with existing ChIP-sequencing data** (Salcedo-Amaya et al. 2009). Normalized mean tag density gene profile of H3K4me3 histone modification over 5,265 *P. falciparum*. Gene unit including transcription start site (TSS) and transcription termination site (TTS) are shown below the plot. H3K4me3 has identical profile with the data produced in this study and with publicly available data (Salcedo-Amaya et al. 2009).

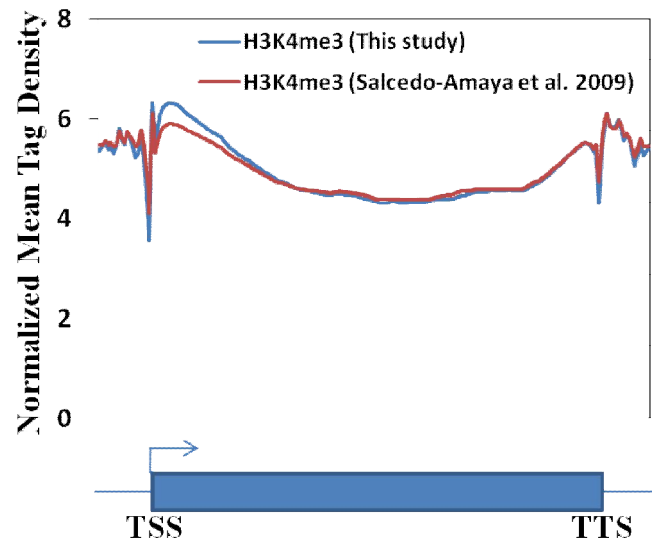

**Additional Figure S5: Comparison of the expression between wild type and SETvs knockout conditions.** Genes are divided into three groups based on expression levels (highest, medium and least expressed) and levels of expression were compared between wild type and 3D7SetvsKO conditions. Up-regulation of genes is observed across the categories.

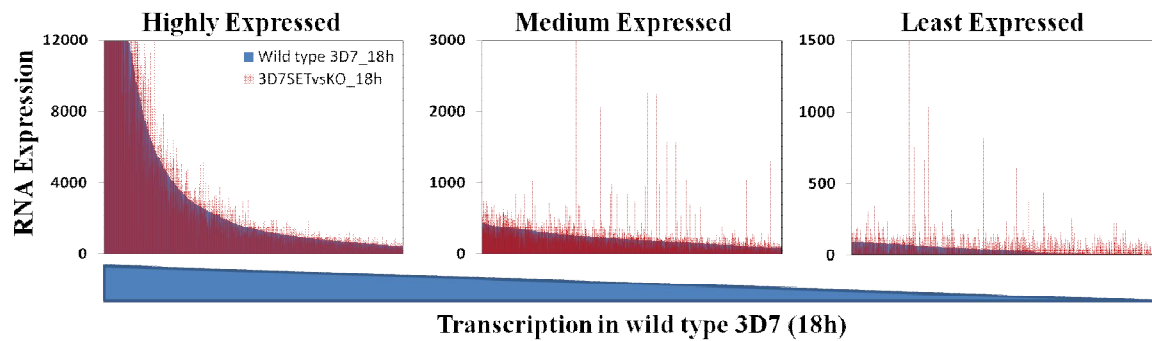

**Additional Figure S6. Gene Ontology (GO) Analysis of the clusters based on histone modification profiles.** Clusters described in Figure 4 are subjected to gene ontology analysis using MADIBA (Law et al. 2008); an online web interface (<http://madiba.bi.up.ac.za/>). REVIGO (revigo.irb.hr) was used to summarize and visualize gene ontology terms. Genes in cluster 1 are mostly associated with housekeeping functions and cell growth. Genes in cluster 2 are associated with evasion or tolerance of host immune response. Genes in cluster 3 are associated with stimulus-dependent functions. Genes in the cluster 4 associated with functions such as entry into host.

### Cluster 1

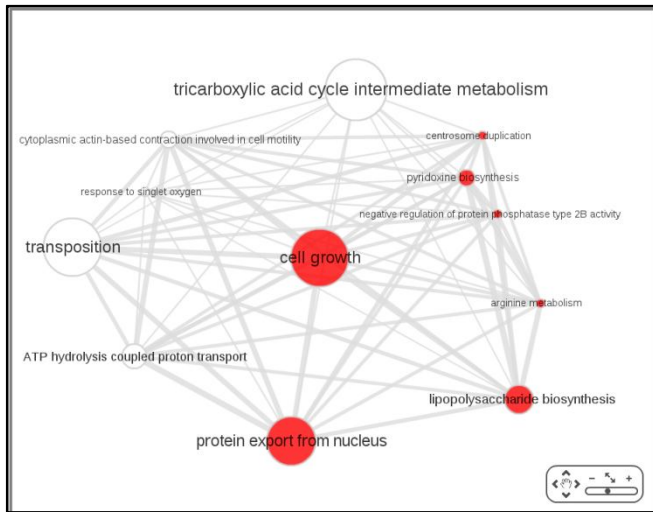

### Cluster 2

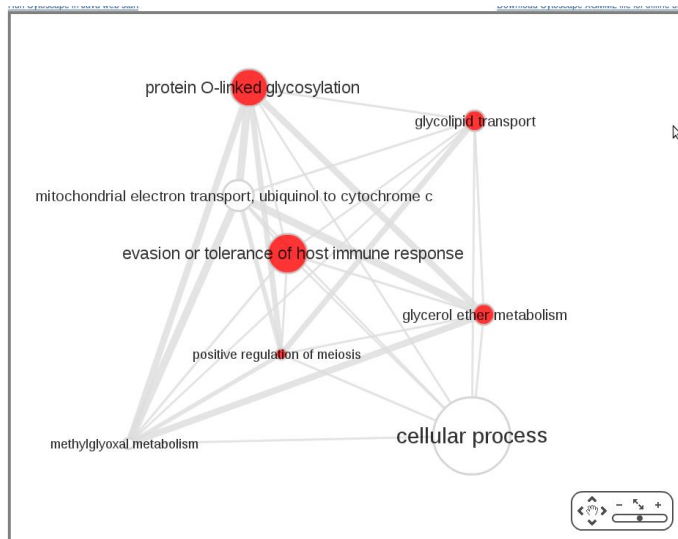

### Cluster 3

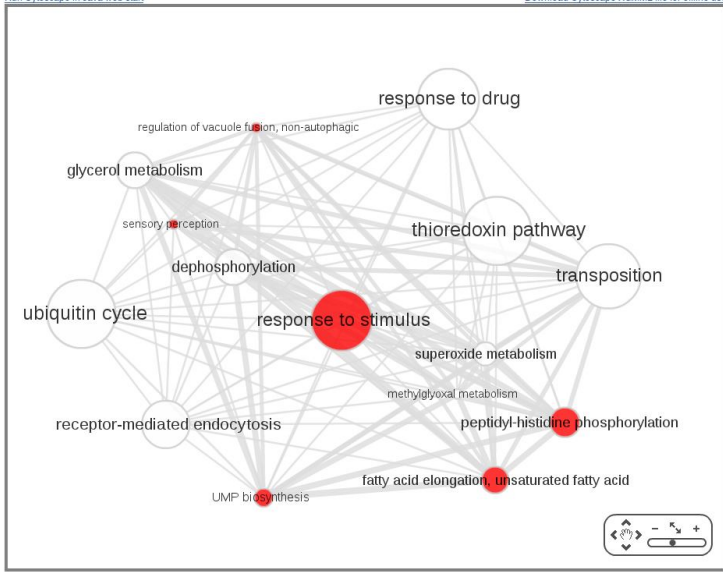

### Cluster 4

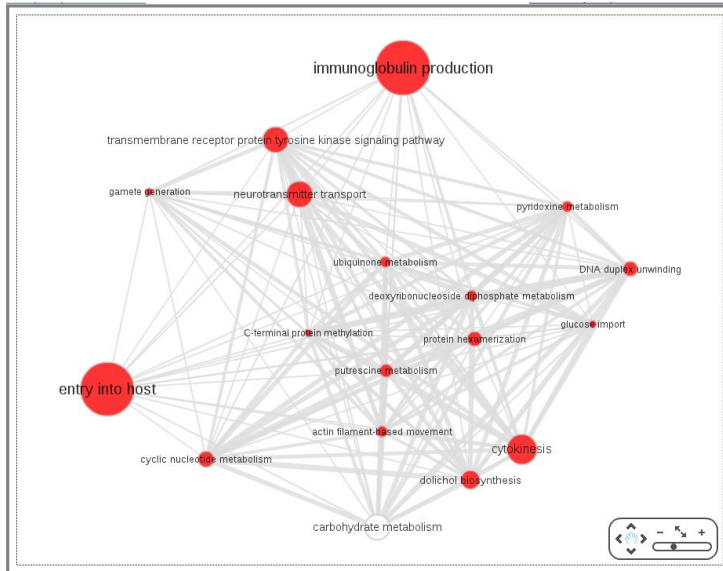



### Additional Figure S7. Correlation between gene expression and length of different cultures.

Box plots shows decrease in the expression levels of clusters from 1 to 4 and its inverse correlation with gene length. Further to cross-examine the correlation between gene expression and ratio of inactivation to activation mark, we calculated the ratio of inactivation and activation marks on the clusters 1 to 4.

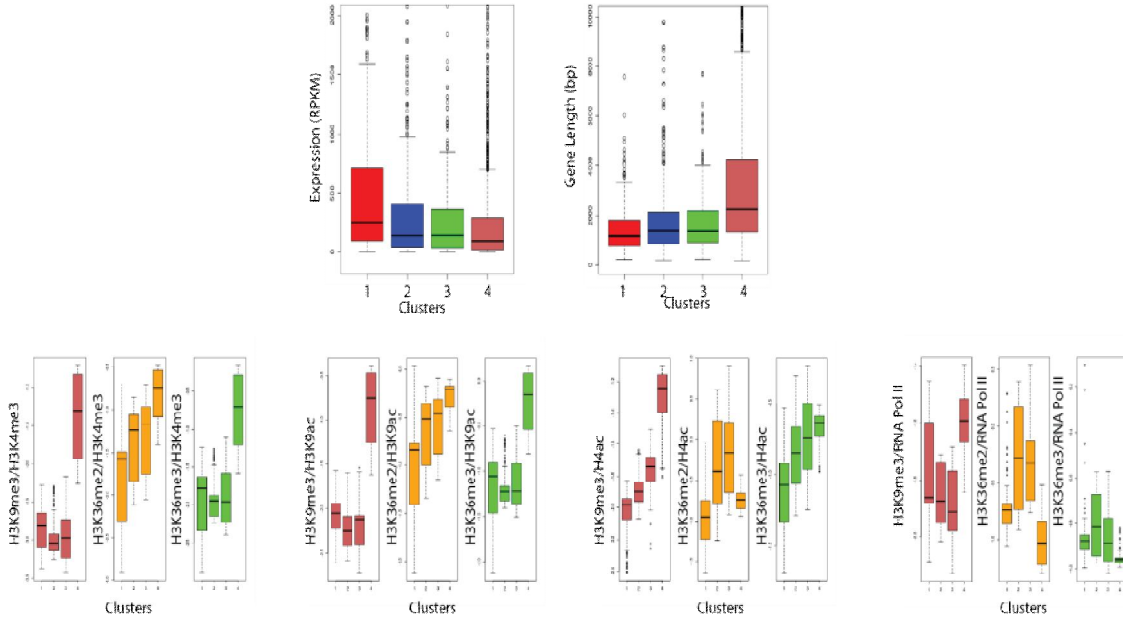

**Additional Figure S8. Clustering of *P. falciparum* CVM genes based on histone modification profiles.** Heatmap of the signal density using k-means clustering observed on CVM genes for histone modifications; H3K4me3, H3K9ac, H4ac, H3K9me3, H3K36me2, H3K36me3 and H4K20me3 at trophozoite stage. Average profile of genes shows on right hand side for all the CVM genes. H3K36me2 is absent on CVM genes.

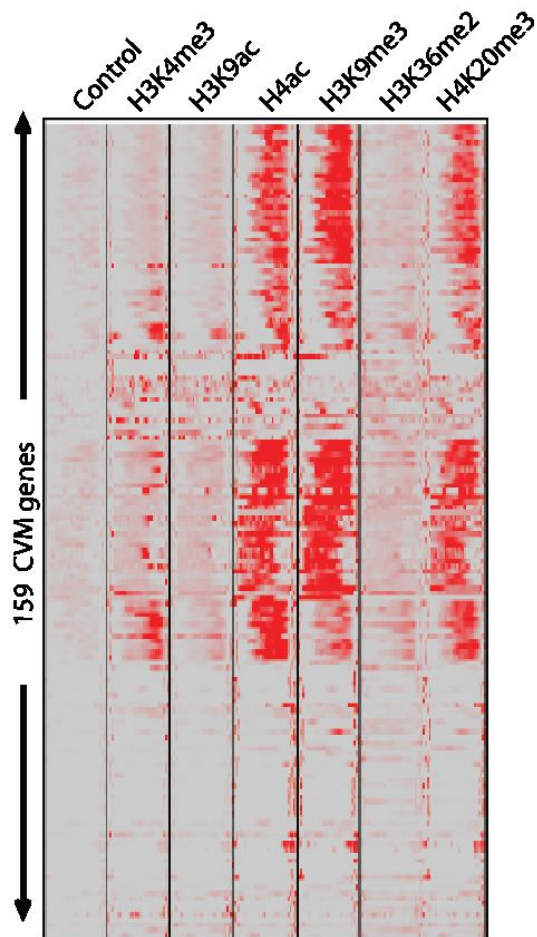

**Additional Figure S9: Comparison of profiles of H3K4me3 and H3K9ac after normalizing with pan-H3 over averaged *Plasmodium falciparum* genes.** (A) Mean tag density gene profile of pan-H3, H3K9ac and H3K4me3 histone modifications over 5,265 *P. falciparum* genes. (B) Profiles of H3K4me3 and H3K9ac normalized with pan-H3. Gene unit including transcription start site (TSS) and transcription termination site (TTS) is shown below. H3K4me3 and H3K9ac show comparable profiles after normalizing with pan-H3 suggesting presence of active histone modifications over the promoter and coding regions.

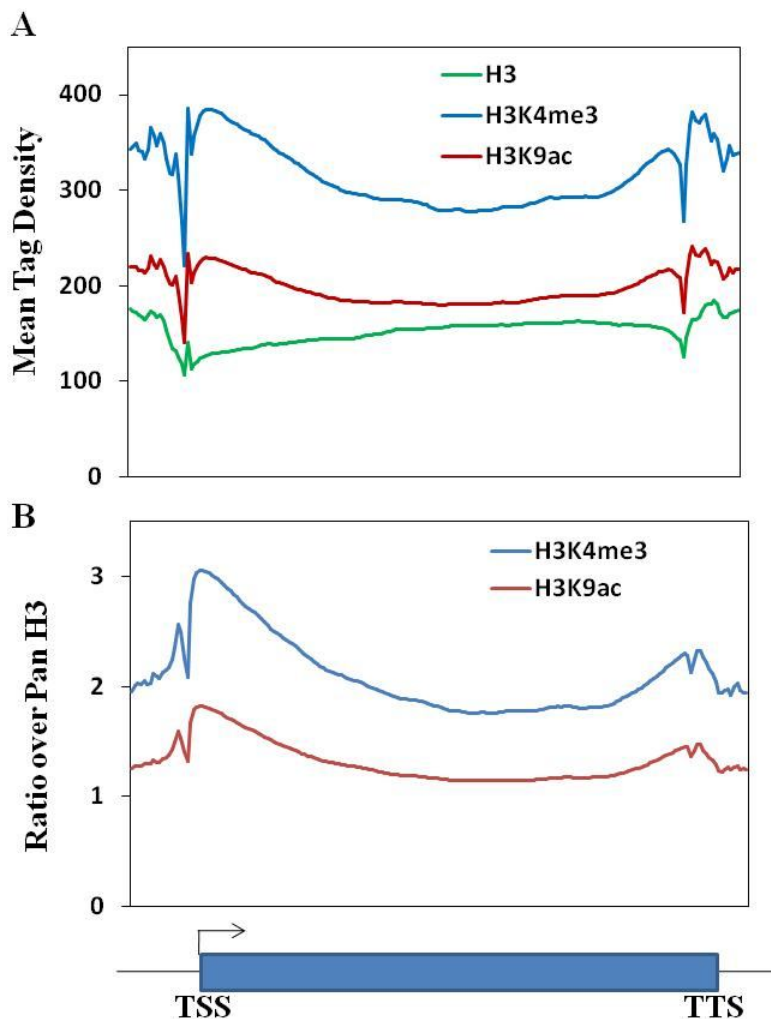

**Additional Figure S10: Western blot for histone modifications using *Plasmodium falciparum* lysate.**

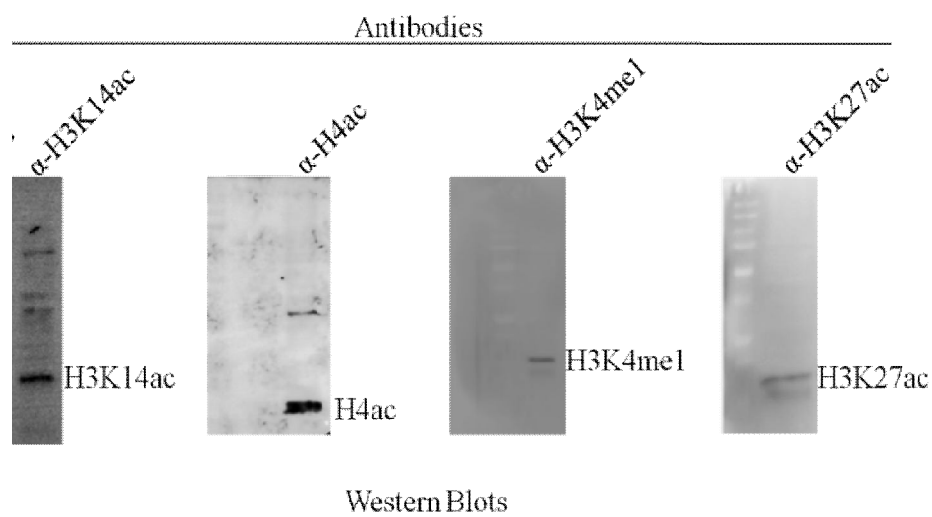

**Additional Figure S11: Representative alignments of new TSSs, 5'EST with reported gene models.**

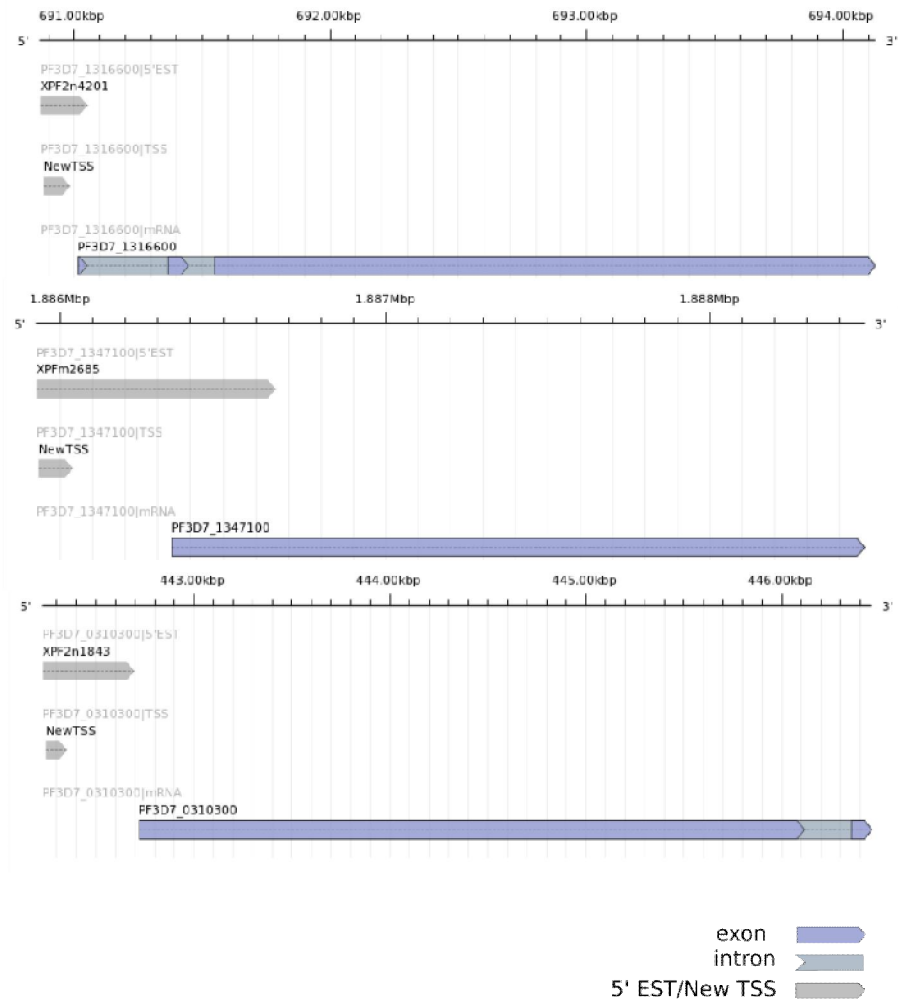

## References

1. Law PJ, Claudel-Renard C, Joubert F, Louw AI, Berger DK. MADIBA: A web server toolkit for biological interpretation of Plasmodium and plant gene clusters. *BMC Genomics*. 2008;**9**:105
2. Salcedo-Amaya AM, van Driel MA, Alako BT, Trelle MB, van den Elzen AM, et al. Dynamic histone H3 epigenome marking during the intraerythrocytic cycle of *Plasmodium falciparum*. *Proc Natl Acad Sci U S A*. 2009;**106**:9655-9660.

**Additional Table S1: Sequence statistics for ChIP-sequencing performed in this study of *Plasmodium falciparum*.**

| SN | Samples              | Total Reads | Unique Reads | Source      | GEO accession number |
|----|----------------------|-------------|--------------|-------------|----------------------|
| 1  | Input Rings          | 32,079,104  | 14,293,619   | IISER, Pune | GSM1547552           |
| 2  | Input Trophozoites   | 35,070,605  | 16,030,714   | IISER, Pune | GSM1547553           |
| 3  | Input Schizonts      | 34,445,594  | 16,953,112   | IISER, Pune | GSM1547554           |
| 4  | H3K4me3 Rings        | 18,907,588  | 09,544,802   | IISER, Pune | GSM1547561           |
| 5  | H3K4me3 Trophozoites | 39,590,191  | 21,645,073   | IISER, Pune | GSM1547562           |
| 6  | H3K4me3 Schizonts    | 37,674,527  | 20,898,339   | IISER, Pune | GSM1547563           |
| 7  | H3K4me2 Rings        | 18,293,031  | 9,632,411    | IISER, Pune | GSM1547558           |
| 8  | H3K4me2 Trophozoites | 39,765,501  | 22,445,724   | IISER, Pune | GSM1547559           |
| 9  | H3K4me2 Schizonts    | 37,584,468  | 21,567,161   | IISER, Pune | GSM1547560           |
| 10 | H3K4me1 Rings        | 53,036,091  | 15,622,070   | IISER, Pune | GSM1547555           |
| 11 | H3K4me1 Trophozoites | 42,075,070  | 10,394,974   | IISER, Pune | GSM1547556           |
| 12 | H3K4me1 Schizonts    | 39,996,420  | 15,184,404   | IISER, Pune | GSM1547557           |
| 13 | H3K9ac Rings         | 29,409,217  | 14,883,877   | IISER, Pune | GSM1547564           |
| 14 | H3K9ac Trophozoites  | 33,134,046  | 14,472,407   | IISER, Pune | GSM1547565           |
| 15 | H3K9ac Schizonts     | 34,277,436  | 16,501,918   | IISER, Pune | GSM1547566           |
| 16 | H3K14ac Rings        | 28,807,980  | 15,114,365   | IISER, Pune | GSM1547570           |
| 17 | H3K14ac Trophozoites | 33,240,504  | 14,939,580   | IISER, Pune | GSM1547571           |
| 18 | H3K14ac Schizonts    | 33,048,458  | 16,472,820   | IISER, Pune | GSM1547572           |
| 19 | H3K27ac Rings        | 43,794,654  | 1,763,346    | IISER, Pune | GSM1547573           |
| 20 | H3K27ac Trophozoites | 59,494,138  | 2,646,663    | IISER, Pune | GSM1547574           |
| 21 | H3K27ac Schizonts    | 38,934,545  | 1,769,273    | IISER, Pune | GSM1547575           |
| 22 | H4ac Rings           | 44,267,508  | 26,762,078   | IISER, Pune | GSM1547582           |
| 23 | H4ac Trophozoites    | 38,640,318  | 16,589,677   | IISER, Pune | GSM1547583           |
| 24 | H4ac Schizonts       | 44,388,449  | 15,442,044   | IISER, Pune | GSM1547584           |
| 25 | H3K9me3 Rings        | 34,907,641  | 6,623,072    | IISER, Pune | GSM1547567           |
| 26 | H3K9me3 Trophozoites | 32,881,747  | 7,010,653    | IISER, Pune | GSM1547568           |

|    |                         |            |            |             |            |
|----|-------------------------|------------|------------|-------------|------------|
| 27 | H3K9me3 Schizonts       | 36,583,216 | 4,503,280  | IISER, Pune | GSM1547569 |
| 28 | H3K79me3 Rings          | 29,948,048 | 10,059,303 | IISER, Pune | GSM1547579 |
| 29 | H3K79me3 Trophozoites   | 63,232,531 | 7,483,233  | IISER, Pune | GSM1547580 |
| 30 | H3K79me3 Schizonts      | 37,683,293 | 13,325,023 | IISER, Pune | GSM1547581 |
| 31 | H3K27me3 Rings          | 71,580,449 | 4,049,693  | IISER, Pune | GSM1547576 |
| 32 | H3K27me3 Trophozoites   | 30,559,535 | 1,668,129  | IISER, Pune | GSM1547577 |
| 33 | H3K27me3 Schizonts      | 42,957,936 | 1,755,895  | IISER, Pune | GSM1547578 |
| 34 | Histone H3 Rings        |            | 16,234,932 | IISER, Pune | GSM1547585 |
| 35 | Histone H3 Trophozoites |            | 13,479,404 | IISER, Pune | GSM1547586 |
| 36 | Histone H3 Schizonts    |            | 14,165,066 | IISER, Pune | GSM1547587 |



**Additional Table S2: Sequence statistics for ChIP-sequencing and RNA sequencing from GEO data base for *Plasmodium falciparum*.**

| SN | Sample             | Total Reads | Source             | GEO accession number |
|----|--------------------|-------------|--------------------|----------------------|
| 1  | H3K4me3 Rings      | 16,019,252  | NHLBI, NIH         | SRX278216            |
| 2  | H3K36me2 Rings     | 09,975,379  | NHLBI, NIH         | SRX278212            |
| 3  | H3K36me2 Schizonts | 13,323,607  | NHLBI, NIH         | SRX278213            |
| 4  | H3K36me3 Rings     | 10,963,984  | NHLBI, NIH         | SRX278214            |
| 5  | H3K36me3 Schizonts | 11,918,973  | NHLBI, NIH         | SRX278215            |
| 6  | H3K9me3 Rings      | 11,945,913  | NHLBI, NIH         | SRX278218            |
| 7  | H3K9me3 Schizonts  | 12,899,941  | NHLBI, NIH         | SRX278219            |
| 8  | H4K20me3 Rings     | 12,040,010  | NHLBI, NIH         | SRX278220            |
| 9  | H4K20me3 Schizonts | 11,775,490  | NHLBI, NIH         | SRX278221            |
| 10 | H2A.z Rings        | 5,500,000   | NCMLS, Netherlands | SRX026758            |
| 11 | H2A.z Trophozoites | 5,500,000   | NCMLS, Netherlands | SRX026760            |
| 12 | H2A.z Schizonts    | 5,500,000   | NCMLS, Netherlands | SRX026761            |
| 13 | RNA seq 5hpi       | 13,617,055  | NCMLS, Netherlands | SRX026750            |
| 14 | RNA seq 10hpi      | 14,878,153  | NCMLS, Netherlands | SRX026751            |
| 15 | RNA seq 15hpi      | 13,312,805  | NCMLS, Netherlands | SRX026752            |
| 13 | RNA seq 20hpi      | 13,472,352  | NCMLS, Netherlands | SRX026753            |
| 14 | RNA seq 25hpi      | 15,449,937  | NCMLS, Netherlands | SRX026754            |
| 15 | RNA seq 30hpi      | 12,328,314  | NCMLS, Netherlands | SRX026755            |
| 14 | RNA seq 35hpi      | 19,286,750  | NCMLS, Netherlands | SRX026756            |
| 15 | RNA seq 40hpi      | 14,685,226  | NCMLS, Netherlands | SRX026757            |

**Additional Table S3: Sequence statistics and accession number of human histone modifications.**

| SN | Samples  | Unique Reads | Source             | GEO accession number |
|----|----------|--------------|--------------------|----------------------|
| 1  | Input    | 03,997,695   | BCH, Boston        | GSM908072            |
| 2  | H3K4me3  | 02,477,162   | NHLBI, NIH         | GSM317587            |
| 3  | H3K4me2  | 10,535,411   | BCH, Boston        | GSM908036            |
| 4  | H3K4me1  | 11,394,632   | NHLBI, NIH         | GSM317586            |
| 5  | H3K9ac   | 14,048,450   | BCH, Boston        | GSM908049            |
| 6  | H3K14ac  | 10,286,660   | NCMLS, Netherlands | GSM566174            |
| 7  | H3K27ac  | 04,881,487   | BCH, Boston        | GSM908050            |
| 8  | H3K9me3  | 06,988,838   | BCH, Boston        | GSM908040            |
| 9  | H3K79me3 | 10,396,173   | NCMLS, Netherlands | GSM566173            |
| 10 | H3K27me3 | 12,706,292   | BCH, Boston        | GSM908042            |
| 12 | H2A.z    | 09,896,954   | NHLBI, NIH         | GSM317582            |
| 13 | H3K36me3 | 14,481,568   | NHLBI, NIH         | GSM317585            |
| 14 | H3K36me2 | 18,873,140   | BCH, Boston        | GSM908044            |
| 15 | H4K20me3 | 05,938,007   | RU, Netherlands    | GSM749527            |

**Additional Table S4. Correlation of histone modifications and transcription including and excluding virulence genes.** Pearson correlation (r) was calculated between the median of gene expression and histone enrichment including and excluding virulence genes (first three subsets in Figure 3A, which are also enriched with H3K9me3). H3K36me2 shows negative correlation with expression (Pearson correlation -0.79) when the virulence genes are excluded.

| Histone Modifications | Pearson correlation (all genes) | Pearson correlation (virulence genes excluded) |
|-----------------------|---------------------------------|------------------------------------------------|
| H3K4Me1               | 0.81                            | 0.79                                           |
| H3K4Me2               | 0.80                            | 0.79                                           |
| H3K4Me3               | 0.81                            | 0.80                                           |
| H3K9ac                | 0.88                            | 0.87                                           |
| H3K14ac               | 0.85                            | 0.87                                           |
| H3K36me2              | 0.24                            | -0.79                                          |
| H3K36me3              | 0.69                            | 0.70                                           |
| H4ac                  | 0.58                            | 0.69                                           |
| H4K20me3              | 0.61                            | 0.68                                           |
| H4K79me3              | 0.62                            | 0.69                                           |

**Additional Table S5.** List of genes and their co-ordinates for each cluster is provided in a separate excel file.

**Additional Table S6.** Co-ordinates for transcription start sites (TSSs) and transcription termination sites (TTSs) for all the *Plasmodium falciparum* genes.

**Additional Table S7: Primers used for ChIP-qPCR and PCR.**

| <b>SN</b> | <b>Gene name</b>          | <b>Primer</b>                | <b>Used for</b> |
|-----------|---------------------------|------------------------------|-----------------|
| 1         | PF11_0468_Sense_RT_R      | AACATGCTCATTCTATTTTTGACA     | RT-R            |
| 2         | PF11_0468_Sense_PCR_F     | TGTGCACATGGGAATTTCA          | PCR-F           |
| 3         | PF11_0468_Sense_PCR_R     | CTCTTCAATAGCATCCTCTTCATT     | PCR-R           |
| 4         | PF11_0468_antiSense_RT_F  | AACAAAAATGGGTTAGCTCATATAAA   | RT-F            |
| 5         | PF11_0468_antiSense_PCR_F | TTTGGATGATATAGCACAAGGGAAG    | PCR-F           |
| 6         | PF11_0468_antiSense_PCR_R | TTCCCTGTTGAACATTCCT          | PCR-R           |
| 7         | PF10_0287_Sense_RT_R      | TCAGGAAGTGTTTGTATATTATTAATGC | RT-R            |
| 8         | PF10_0287_Sense_PCR_F     | GTAGACGTCGCAGTTCATGG         | PCR-F           |
| 9         | PF10_0287_Sense_PCR_R     | TCAATATCGCTGTATAACTTTTCTTCA  | PCR-R           |
| 10        | PF10_0287_antiSense_RT_F  | GGTTTAGTTTCCGCTGCAAT         | RT-F            |
| 11        | PF10_0287_antiSense_PCR_F | TTGGTTTCACTCACCTATGACA       | PCR-F           |
| 12        | PF10_0287_antiSense_PCR_R | ATCTGCTGGCCATACGTTTT         | PCR-R           |
| 13        | Pf11_0468                 | TGTGCACATGGGAATTTCA          | ChIP-qPCR       |
| 14        | Pf11_0468                 | CTCTTCAATAGCATCCTCTTCATT     | ChIP-qPCR       |
| 15        | Pf10_0287                 | CCATGAACTGCGACGTCTAC         | ChIP-qPCR       |
| 16        | Pf10_0287                 | AAAAATCCCTTAAAAAGATGAGTGA    | ChIP-qPCR       |
| 17        | PF13_0303                 | CAACCATCGTTCCTTGACCT         | ChIP-qPCR       |
| 18        | PF13_0303                 | GTAACCGTGCGTGTGCTTTA         | ChIP-qPCR       |
| 19        | PF13_0088                 | TTTTAAAGCATCTTCATTTGATGG     | ChIP-qPCR       |
| 20        | PF13_0088                 | AAATTGGATGAAATGTGATGATAA     | ChIP-qPCR       |
| 21        | PF11_0071                 | CACCTAACCCTTTTATATGACTGTG    | ChIP-qPCR       |
| 22        | PF11_0071                 | TTCGCCTTTGTGAAATAAAAAT       | ChIP-qPCR       |
| 23        | Control                   | AACGTAAATTTTGAATCCGAGA       | ChIP-qPCR       |
| 24        | Control                   | AATCTCCGAGACCGGGAAT          | ChIP-qPCR       |

**Additional Table S8: Co-ordinates and primers used for the cloning of bidirectional promoters**

| <b>Gene name</b> | <b>Co-ordinates</b>      | <b>Forward primer</b>                 | <b>Reverse primer</b>                |
|------------------|--------------------------|---------------------------------------|--------------------------------------|
| PF08_0135        | Chr8:1216102-<br>1217144 | GCGGCTAGCATTTCATAATG<br>CAGCTGGGAAATA | GCGACCGGTTGACTTGTTG<br>GCTTGTTATAAAT |
| PF11_0210        | Chr11:764608-<br>765598  | GCGGCTAGCTTTATAGAGAT<br>CCCGTTCAGTGAT | GCGACCGGTTTTTGATTTCA<br>TCATTTCTCTT  |
